# Supplementary material
Source: publisher figshare collection journal article supplement (https://gsapubs.figshare.com/ndownloader/files/22478114)
Supplement: Supplementary file 1 [file 22478114]

## **SUPPLEMENTARY**

### **Text S1. Hydraulic head measurement**

Hydraulic heads at known depths were measured at fourteen well clusters during the 12 years (W1 - W14, Supplementary Table S1). Each well cluster contained at least three wells made from 1.91 cm or 2.54 cm nominal internal diameter PVC pipe fitted with 30 cm long machine slotted screens. The elevation of the top of each monitoring well was measured using an Ashtech dual frequency GPS. Standard errors calculated by postprocessing software were less than 1 cm. Elevation differences within each cluster were checked periodically using a carpenter's level over time, with little change observed. Water levels in monitoring wells were measured using an electrical water-level indicator, and converted to elevation above mean sea level using the resulting data. The head data were manually contoured using a 0.5 meter contour interval, and contour lines were constrained assuming zero flux boundary conditions at the interface between peat and low permeability sediment. Flow lines were assumed to deflect into the high permeability esker sediments.

### **Text S2. Methane, ammonium and phosphorus data**

Porewater samples for dissolved CH<sub>4</sub> concentration (mg CH<sub>4</sub> L<sup>-1</sup>) were collected from

20 Sites G1 and G2 on 2012 September 13, and from Sites G2 and G3 on 2012  
21 November 26 (Bon et al., 2014). The head space of sample vials was capped and  
22 sealed with Polytetrafluoroethylene (PTFE) coated red rubber septa and aluminum  
23 crimp seals. A SRI 8610C Gas Chromatograph (GC) with flame ionization detector  
24 (FID) and thermal conductivity detector (TCD) was used to obtain methane  
25 concentrations. Methane was vaporized from the water samples with an oven and  
26 directly injected into the GC (Bon et al., 2014). The dissolved CH<sub>4</sub> concentration at  
27 each depth was determined by in-situ production, consumption and net CH<sub>4</sub> flux.

28

29 Porewater samples for ammonium (NH<sub>4</sub><sup>+</sup>) and soluble reactive phosphorus (P)  
30 concentration were collected on 1999 Nov 16 and 2000 May 15 using a vacuum pump  
31 to pull samples into an Erlenmeyer flask, from the same depths of the same wells  
32 where hydraulic heads were measured. Water was placed into pre-cleaned plastic  
33 sample containers, transported to the lab, filtered and then analyzed. The samples  
34 were analyzed in the Maine Agricultural and Forest Experiment Station (MAFES)  
35 Analytical Laboratory. All samples were taken to the laboratory, refrigerated at 4 °C  
36 and analyzed within 21 days of collection. The samples were decanted into  
37 high-density polyethylene (HDPE) bottles and filtered (0.045 micron) in the  
38 laboratory. Ammonium was analyzed using a Wescom Ammonia Analyzer.  
39 Phosphorus concentrations were analyzed by plasma spectrometry (Jarrel–Ash ICP).

40

41    **Text S3. Distances between eccentric bogs and major esker systems**

42    The distances between 231 eccentric bogs and nearest esker were measured (QGIS v.  
43    3.10) and form a heavy-tailed frequency distribution. Outliers identified with a Q-Q  
44    plot (R v. 3.4) are associated with eccentric bogs without nearby exposed eskers, such  
45    as those north and west of Vanern Lake, Sweden (Figure, 4C), suggesting other  
46    pool-clustering processes unrelated to eskers, or buried eskers not reaching the surface.  
47    Discarding positive outliers exceeding 1.5 times the interquartile range results in a  
48    skewed normal frequency (Mean = 9.06 km, Std. Dev. = 5.85 km, Skewness = 2.05).  
49    Considering the map scale of Figure 4A-4C, the mean value, 9.06 km, is a small  
50    distance comparable to the distance between the Central Unit of Caribou Bog and the  
51    major surficial branches of the Katahdin esker system (Supplementary Figure S1).  
52    Smaller surficial eskers extending from the major branches of the esker systems  
53    shown in Fig. 4 were deposited before and thus below glacio-marine clay, leaving  
54    some higher relief parts of the esker locally in contact with the upper peat soil across  
55    the cay (Comas et al., 2005, 2011) and impacting downward flows within the  
56    eccentric bogs.

57

58

59

60

61

62

63

64

65

66

67 **REFERENCES CITED**

68 Bon, C., Reeve, A., Slater, L., and Comas, X., 2014, Using hydrologic measurements  
69 to investigate free-phase gas ebullition in a Maine peatland, USA: Hydrology and  
70 Earth System Sciences, v. 18, p. 953–965, doi:10.5194/hess-18-953-2014.

71 Comas, X., Slater, L., and Reeve, A., 2011, Pool patterning in a northern peatland:  
72 Geophysical evidence for the role of postglacial landforms: Journal of hydrology,  
73 v. 399, p. 173–184, doi:10.1016/j.jhydrol.2010.12.031.

74 Comas, X., Slater, L., and Reeve, A., 2005, Stratigraphic controls on pool formation  
75 in a domed bog inferred from ground penetrating radar (GPR): Journal of  
76 Hydrology, v. 315, p. 40–51, doi:10.1016/j.jhydrol.2005.04.020.

77

78

79

80

81

82

83

84 **FIGURES**

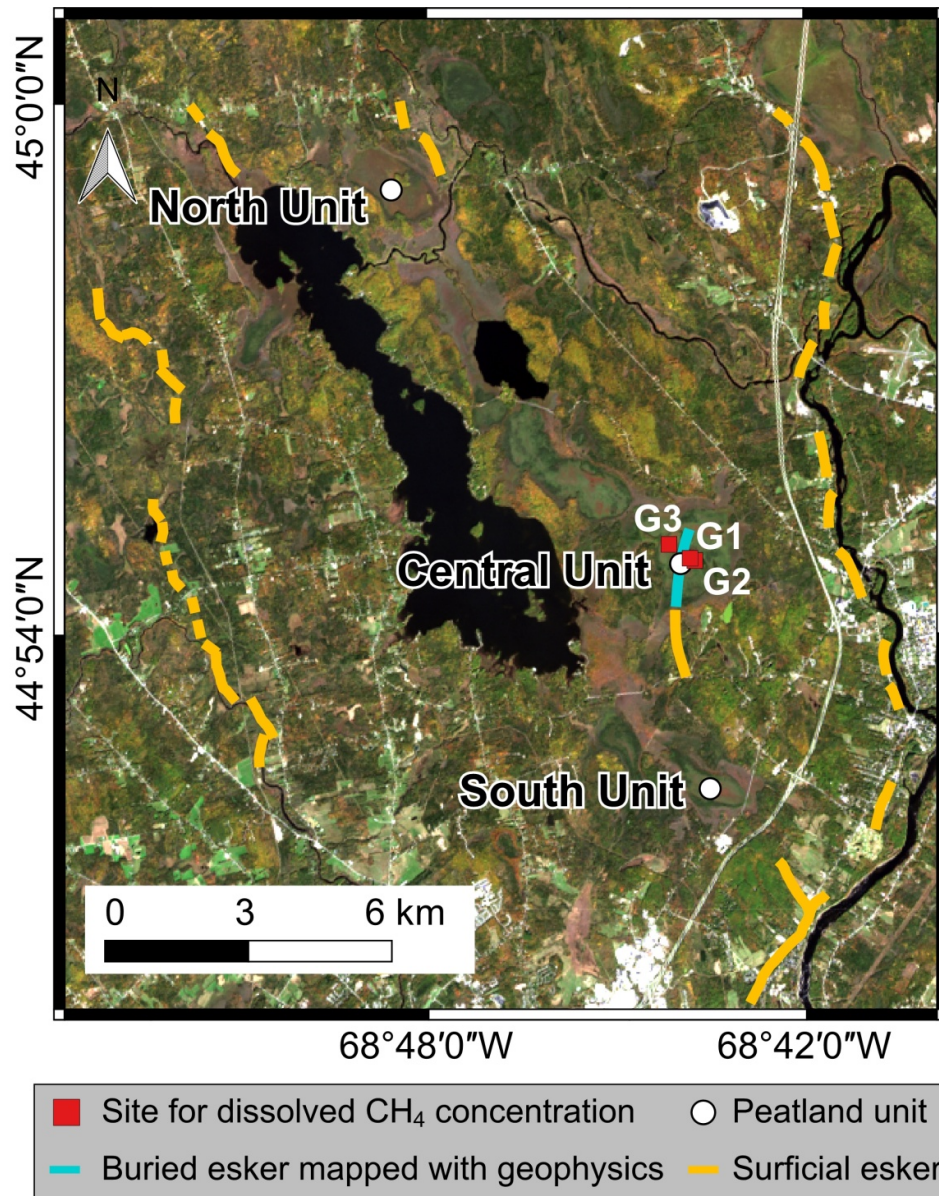

Figure S1. Porewater samples for dissolved CH<sub>4</sub> concentration were collected from three sites G1, G2 and G3 in the Central Unit of Caribou bog, about three km away from the major surficial branches of the Katahdin esker system. Geophysical datasets show that the surficial eskers on the southern edge of the Central Unit (not shown in Fig. 4) descend below glacio-marine clay and are locally in contact with the upper peat soil in the Central Unit (Comas et al., 2005, 2011).

**TABLE**

Table S1. Water table elevation and hydraulic head (cm) data. 'NA' means null reading.

| Well | Sensor position | Aug-5-1999 (cm) | Apr-26-2000 (cm) |
|------|-----------------|-----------------|------------------|
| 1    | Water table     | 39.42           | 39.92            |
| 1    | Surface         | 39.19           | 39.84            |
| 1    | Deep            | 39.73           | 39.91            |
| 2    | Water table     | 39.62           | 39.90            |
| 2    | Surface         | 39.62           | 39.86            |
| 2    | Deep            | 39.63           | 39.89            |
| 3    | Water table     | 40.58           | 40.80            |
| 3    | Surface         | 40.86           | 40.60            |
| 3    | Medium          | 40.58           | 40.67            |
| 3    | Deep            | 40.36           | 40.63            |
| 4    | Water table     | 41.06           | 41.12            |
| 4    | Surface         | 41.05           | 41.32            |
| 4    | Medium          | 41.23           | 41.19            |
| 4    | Deep            | 38.60           | 40.27            |
| 5    | Water table     | 41.14           | 41.28            |
| 5    | Surface         | 41.16           | 41.26            |
| 5    | Medium (upper)  | 41.14           | 41.32            |
| 5    | Medium (lower)  | 41.09           | 41.22            |
| 5    | Deep            | 38.88           | 40.85            |
| 6    | Water table     | 40.85           | 41.05            |
| 6    | Surface         | NA              | 41.04            |
| 6    | Medium          | 41.25           | 41.47            |
| 6    | Deep            | 39.94           | 41.00            |
| 7    | Water table     | 40.73           | 40.97            |
| 7    | Surface         | 40.78           | 40.98            |
| 7    | Medium          | 40.79           | 40.93            |
| 7    | Deep            | 40.76           | 40.92            |
| 8    | Water table     | 39.23           | 39.34            |
| 8    | Surface         | 39.23           | 39.34            |
| 8    | Deep            | 39.19           | 39.34            |
| 9    | Water table     | 39.52           | 39.74            |
| 9    | Surface         | NA              | NA               |
| 9    | Deep            | 39.49           | 39.73            |
| 10   | Water table     | 39.01           | NA               |
| 10   | Surface         | 39.02           | NA               |

|    |      |       |    |
|----|------|-------|----|
| 10 | Deep | 39.11 | NA |
|----|------|-------|----|

| <b>Well</b> | <b>Sensor position</b> | <b>May-2-2012 (cm)</b> |
|-------------|------------------------|------------------------|
| 5           | 1.5 m depth            | 40.79                  |
| 5           | 3.0 m depth            | 40.76                  |
| 5           | Mineral deposit        | 40.08                  |
| 6           | 1.5 m depth            | 40.99                  |
| 6           | 3.0 m depth            | 40.95                  |
| 6           | Mineral deposit        | 40.83                  |
| 7           | 1.5 m depth            | 41.00                  |
| 7           | 3.0 m depth            | 40.97                  |
| 7           | Mineral deposit        | 40.96                  |
| 8           | 1.5 m depth            | 39.77                  |
| 8           | 3.0 m depth            | 39.73                  |
| 8           | Mineral deposit        | 39.69                  |



Table S2. Chemistry data. 'NA' means null reading.

| <b>Well</b> | <b>Sampling<br/>position</b> | <b>NH<sub>4</sub><sup>+</sup><br/>(mg N L<sup>-1</sup>)</b> | <b>P<br/>(mg P L<sup>-1</sup>)</b> |
|-------------|------------------------------|-------------------------------------------------------------|------------------------------------|
| 1           | Surface                      | NA                                                          | NA                                 |
| 1           | Deep                         | 4.13                                                        | 0.02                               |
| 2           | Surface                      | 3.46                                                        | 0.52                               |
| 2           | Deep                         | 7.31                                                        | 0.05                               |
| 3           | Surface                      | 0.76                                                        | 0.02                               |
| 3           | Medium                       | 3.01                                                        | 0.17                               |
| 3           | Deep                         | 5.83                                                        | 0.02                               |
| 4           | Surface                      | 4.51                                                        | 0.12                               |
| 4           | Medium                       | 1.43                                                        | 0.29                               |
| 4           | Deep                         | 8.17                                                        | 0.04                               |
| 5           | Surface                      | 0.85                                                        | 0.03                               |
| 5           | Medium (upper)               | 2.75                                                        | 0.10                               |
| 5           | Medium (lower)               | 13.30                                                       | 0.13                               |
| 5           | Deep                         | 19.78                                                       | 0.06                               |
| 6           | Surface                      | NA                                                          | NA                                 |
| 6           | Medium                       | 6.49                                                        | 0.35                               |
| 6           | Deep                         | 11.69                                                       | 0.03                               |
| 7           | Surface                      | 1.40                                                        | 0.16                               |
| 7           | Medium                       | 3.85                                                        | 0.31                               |
| 7           | Deep                         | 8.81                                                        | 0.33                               |
| 8           | Deep                         | 0.85                                                        | 0.02                               |
| 8           | Surface                      | 8.99                                                        | 0.08                               |
| 9           | Surface                      | NA                                                          | NA                                 |
| 9           | Deep                         | 3.96                                                        | 0.11                               |
| 10          | Surface                      | 2.52                                                        | 0.16                               |
| 10          | Deep                         | 6.40                                                        | 0.05                               |

| <b>Well</b> | <b>Sampling<br/>position</b> | <b>NH<sub>4</sub><sup>+</sup><br/>(mg N L<sup>-1</sup>)</b> | <b>P<br/>(mg P L<sup>-1</sup>)</b> |
|-------------|------------------------------|-------------------------------------------------------------|------------------------------------|
| 1           | Surface                      | 1.32                                                        | 0.03                               |
| 1           | Deep                         | 0.12                                                        | 0.01                               |
| 2           | Surface                      | 3.44                                                        | 0.24                               |
| 2           | Deep                         | 3.88                                                        | 0.07                               |
| 3           | Surface                      | 4.43                                                        | 0.01                               |
| 3           | Medium                       | 4.40                                                        | 0.17                               |
| 3           | Deep                         | 6.63                                                        | 0.04                               |
| 4           | Surface                      | 1.15                                                        | 0.10                               |
| 4           | Medium                       | 3.07                                                        | 0.23                               |
| 4           | Deep                         | 5.65                                                        | 0.01                               |
| 5           | Surface                      | 1.80                                                        | 0.07                               |
| 5           | Medium (upper)               | 4.58                                                        | 0.15                               |
| 5           | Medium (lower)               | 5.40                                                        | 0.15                               |
| 5           | Deep                         | 0.94                                                        | 0.11                               |
| 6           | Surface                      | 2.59                                                        | 0.27                               |
| 6           | Medium                       | 11.96                                                       | 0.40                               |
| 6           | Deep                         | 19.01                                                       | 0.01                               |
| 7           | Surface                      | 7.50                                                        | 0.14                               |
| 7           | Medium                       | 13.39                                                       | 0.24                               |
| 7           | Deep                         | 1.77                                                        | 0.24                               |
| 8           | Surface                      | 3.96                                                        | 0.01                               |
| 8           | Deep                         | 7.28                                                        | 0.01                               |
| 9           | Surface                      | NA                                                          | NA                                 |
| 9           | Deep                         | 0.99                                                        | 0.04                               |
| 10          | Surface                      | 0.11                                                        | 0.17                               |
| 10          | Deep                         | 3.88                                                        | 0.01                               |
